# Supplementary material
Source: publisher figshare collection journal article supplement (https://diabetesjournals.figshare.com/ndownloader/files/31037596)

**Quality Improvement Success Story: A Comprehensive System for Identifying Patients With Type 1 Diabetes at Increased Risk for Diabetic Ketoacidosis at Texas Children’s Hospital**

**Supplementary Figure S1:** EMR-implementation of the Risk Index for DKA, showing change in scores over 3 months.


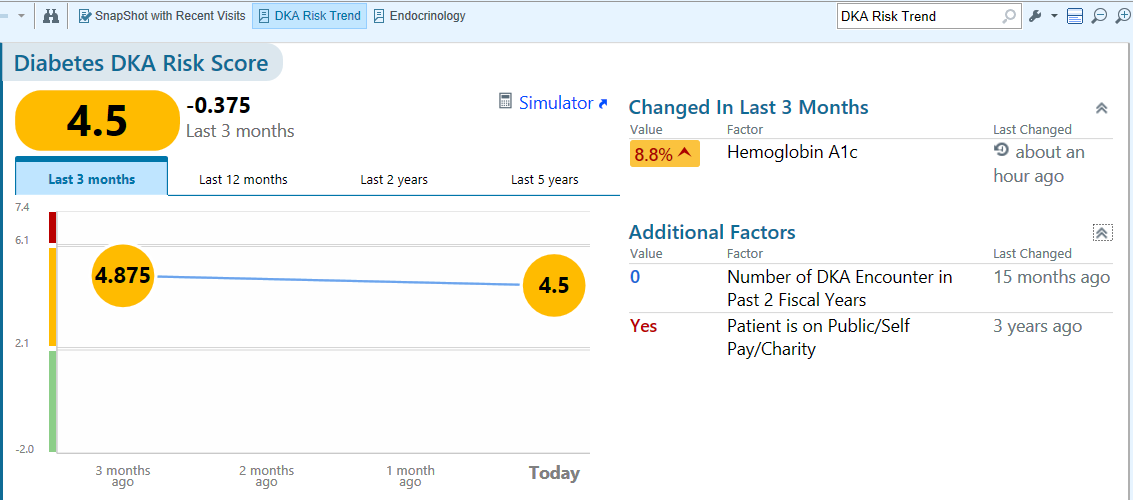

Supplement: Supplementary file 1 [file 31037596]
